# Supplementary material for: Room-temperature rapid synthesis of hierarchically porous ZIF-93 for effective adsorption of volatile organic compounds
Source: Royal Society of Chemistry journal article supplement (doi:10.1039/d4im00033a), 2024-07-04
Supplement: d4im00033a1.pdf [file d4im00033a1.pdf]

## Electronic Supplementary Information

### **Room-temperature rapid synthesis of hierarchically porous ZIF-93 for effective adsorption of volatile organic compounds**

Haiqi Zhang<sup>a</sup>, Kaikai Zhao<sup>a</sup>, Weibiao Guo<sup>a</sup>, Kuan Liang<sup>a</sup>, Jingjing Li<sup>a</sup>, Xu Li<sup>d</sup>,  
Qianjun Deng<sup>a</sup>, Xuejun Xu<sup>a</sup>, Huixia Chao<sup>c</sup>, Hongxia Xi<sup>b,\*</sup>, Chongxiong Duan<sup>a,\*</sup>

<sup>a</sup> School of Materials Science and Hydrogen Engineering, Foshan University, Foshan, 528231, China.

<sup>b</sup> School of Chemistry and Chemical Engineering, South China University of Technology, Guangzhou, 510640, China.

<sup>c</sup> Guangxi Key Laboratory of Green Chemical Materials and Safety Technology, College of Petroleum and Chemical Engineering, Beibu Gulf University, Qinzhou 535011, China.

<sup>d</sup> Key Laboratory of Nuclear Solid-State Physics Hubei Province, School of Physics and Technology, Wuhan University, Wuhan 430072, China.

## Calculation

### Space-Time Yields (STYs)

The space-time yields (STYs, in units of  $\text{kg}\cdot\text{m}^{-3}\cdot\text{d}^{-1}$ ) data were obtained to predict the value of hierarchical porous ZIF-93 for practical applications. The STY was calculated using the following equation:

$$STY = \left( \frac{m_1}{V_{\text{solution}}\tau} \right) \times 1.44 \times 10^6$$

Where  $m_1$  is representative of the dried mass (g) for the as-synthesized hierarchically porous ZIF-93 powder obtained from rapid synthesis at RT,  $V_{\text{solution}}$  is the total volume ( $\text{cm}^3$ ) for the total solution, and  $\tau$  is the stirring time (min).

**Table S1.** Elemental content of C, O, N, and Zn of hierarchical porous ZIF-93\_A $t$  ( $t=1, 10, 60$ ).

| Samples    | C (wt. %) | O (wt. %) | N (wt. %) | Zn (wt. %) |
|------------|-----------|-----------|-----------|------------|
| ZIF-93_A1  | 39.48     | 23.48     | 22.18     | 14.86      |
| ZIF-93_A10 | 35.80     | 19.48     | 28.76     | 15.96      |
| ZIF-93_A60 | 36.99     | 16.51     | 28.44     | 18.06      |

**Table S2.** Porosity properties of the as-synthesized ZIF-93 samples.

| Samples                                   | $S_{\text{BET}}$<br>[ $\text{m}^2 \text{g}^{-1}$ ] | $S_{\text{micro}}$<br>[ $\text{m}^2 \text{g}^{-1}$ ] | $S_{\text{ext}}$<br>[ $\text{m}^2 \text{g}^{-1}$ ] | $V_t$<br>[ $\text{cm}^3 \text{g}^{-1}$ ] | $V_{\text{micro}}$<br>[ $\text{cm}^3 \text{g}^{-1}$ ] | $V_{\text{meso}}$<br>[ $\text{cm}^3 \text{g}^{-1}$ ] | Pore size<br>[nm] | STYs<br>[ $\text{kg m}^{-3} \text{d}^{-1}$ ] |
|-------------------------------------------|----------------------------------------------------|------------------------------------------------------|----------------------------------------------------|------------------------------------------|-------------------------------------------------------|------------------------------------------------------|-------------------|----------------------------------------------|
| ZIF-93_Activated                          | 1071                                               | 954                                                  | 117                                                | 0.51                                     | 0.36                                                  | 0.15                                                 | 6.7               | 3570                                         |
| ZIF-93_ZnNO <sub>3</sub>                  | 519                                                | 429                                                  | 90                                                 | 0.38                                     | 0.16                                                  | 0.22                                                 | 8.7               | 4468                                         |
| ZIF-93_ZnSO <sub>4</sub>                  | 684                                                | 601                                                  | 83                                                 | 0.36                                     | 0.23                                                  | 0.13                                                 | 8.4               | 4883                                         |
| ZIF-93_KOH                                | 849                                                | 740                                                  | 109                                                | 0.45                                     | 0.28                                                  | 0.17                                                 | 6.9               | 4143                                         |
| ZIF-93_NH <sub>3</sub> ·H <sub>2</sub> O  | 794                                                | 720                                                  | 74                                                 | 0.44                                     | 0.27                                                  | 0.17                                                 | 13.4              | 2874                                         |
| Zn <sup>2+</sup> /almeIm=1/0.5            | 66                                                 | 16                                                   | 50                                                 | 0.42                                     | 0.007                                                 | 0.413                                                | 26.5              | 3000                                         |
| Zn <sup>2+</sup> /almeIm=1/4              | 1049                                               | 958                                                  | 91                                                 | 0.50                                     | 0.37                                                  | 0.13                                                 | 4.7               | 5586                                         |
| Zn <sup>2+</sup> /H <sub>2</sub> O=1/5560 | 1224                                               | 1192                                                 | 32                                                 | 0.54                                     | 0.46                                                  | 0.08                                                 | 5.7               | 1244                                         |
| Zn <sup>2+</sup> /H <sub>2</sub> O=1/1390 | 946                                                | 919                                                  | 27                                                 | 0.43                                     | 0.35                                                  | 0.08                                                 | 5.8               | 9670                                         |
| pH=6                                      | 1006                                               | 889                                                  | 117                                                | 0.51                                     | 0.33                                                  | 0.18                                                 | 8.0               | -                                            |

|       |     |     |     |      |      |      |      |   |
|-------|-----|-----|-----|------|------|------|------|---|
| pH=7  | 978 | 874 | 104 | 0.43 | 0.33 | 0.10 | 4.4  | - |
| pH=8  | 771 | 693 | 78  | 0.39 | 0.26 | 0.13 | 7.9  | - |
| pH=9  | 453 | 324 | 129 | 0.58 | 0.12 | 0.46 | 13.7 | - |
| pH=10 | 651 | 499 | 152 | 0.72 | 0.19 | 0.53 | 13.7 | - |

---

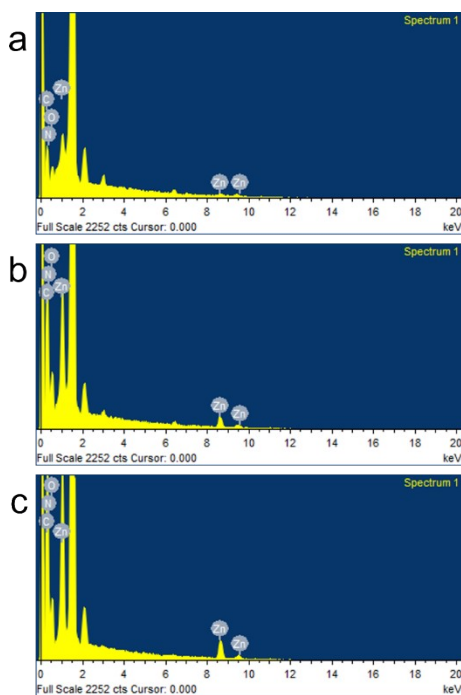

**Fig. S1** The mass ratio and molar ratio of C/O/N/Zn in the (a) ZIF-93\_A1, (b) ZIF-93\_A10, and (c) ZIF-93\_A60.

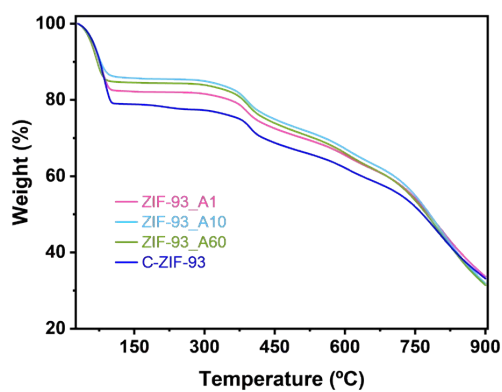

**Fig. S2** TGA curves of ZIF-93\_A<sub>t</sub> and C-ZIF-93 samples.

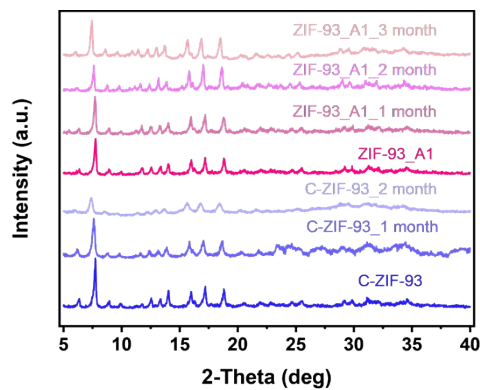

**Fig. S3** XRD patterns of the as-synthesized ZIF-93 after soaking in water at different times.

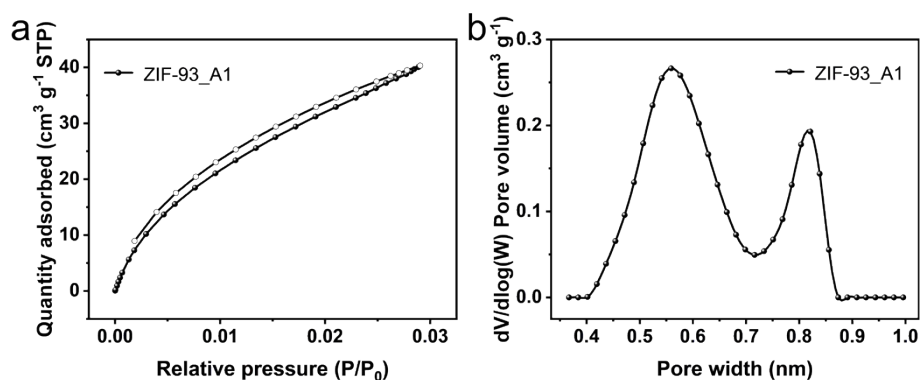

**Fig. S4** (a) CO<sub>2</sub> adsorption-desorption isotherms and (b) PSDs of ZIF-93\_A1 samples.

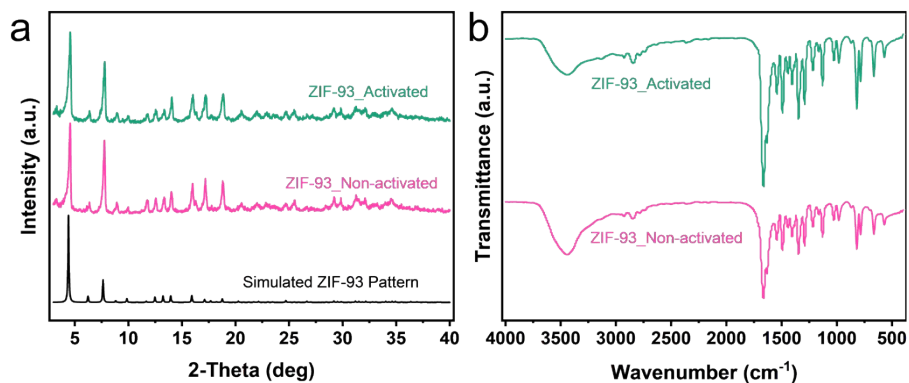

**Fig. S5** (a) Powder XRD patterns of ZIF-93\_Activated and ZIF-93\_Non-activated samples, and simulated XRD pattern of ZIF-93. (b) FT-IR spectra of the as-synthesized ZIF-93\_Activated and ZIF-93\_Non-activated samples.

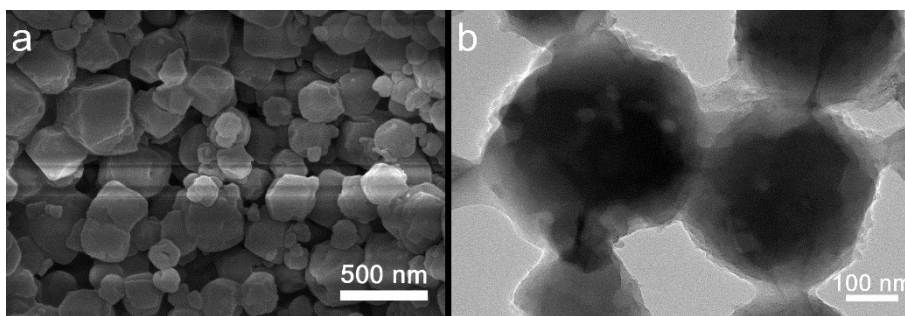

**Fig. S6** SEM and TEM images of ZIF-93\_Activated samples.

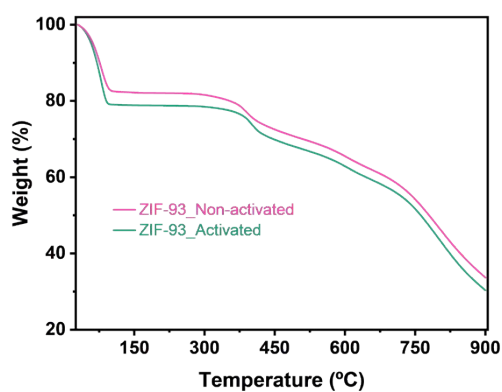

**Fig. S7** TGA curves of ZIF-93\_Activated and ZIF-93\_Non-activated samples.

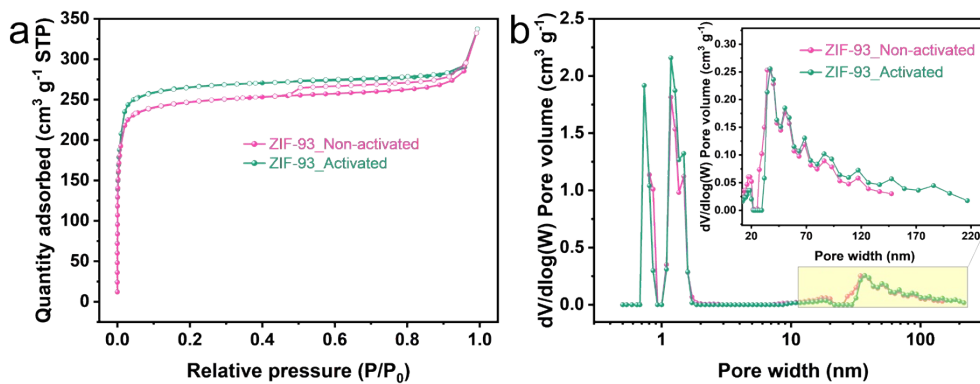

**Fig. S8** (a)  $N_2$  adsorption-desorption isotherms and (b) PSDs of ZIF-93\_Activated and ZIF-93\_Non-activated samples.

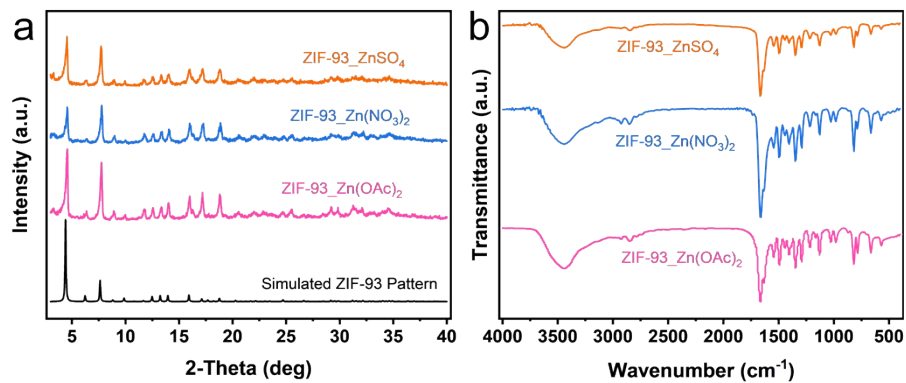

**Fig. S9** (a) Powder XRD patterns of ZIF-93\_Zn(OAc)<sub>2</sub>, ZIF-93\_Zn(NO<sub>3</sub>)<sub>2</sub>, ZIF-93\_ZnSO<sub>4</sub> samples, and simulated XRD pattern of ZIF-93. (b) FT-IR spectra of the as-synthesized ZIF-93\_Zn(OAc)<sub>2</sub>, ZIF-93\_Zn(NO<sub>3</sub>)<sub>2</sub>, and ZIF-93\_ZnSO<sub>4</sub> samples.

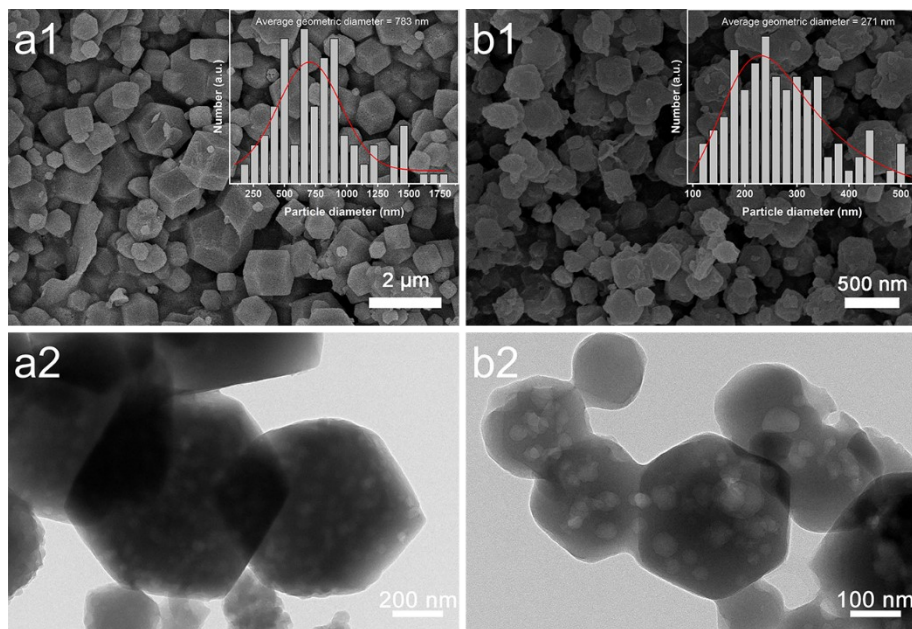

**Fig. S10** SEM and TEM images of ZIF-93 samples: (a) ZIF-93\_ZnSO<sub>4</sub>, (b) ZIF-93\_Zn(NO<sub>3</sub>)<sub>2</sub>.

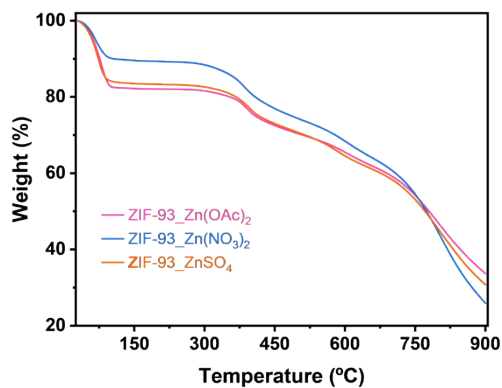

**Fig. S11** TGA curves of ZIF-93\_Zn(OAc)<sub>2</sub>, ZIF-93\_Zn(NO<sub>3</sub>)<sub>2</sub>, and ZIF-93\_ZnSO<sub>4</sub> samples.

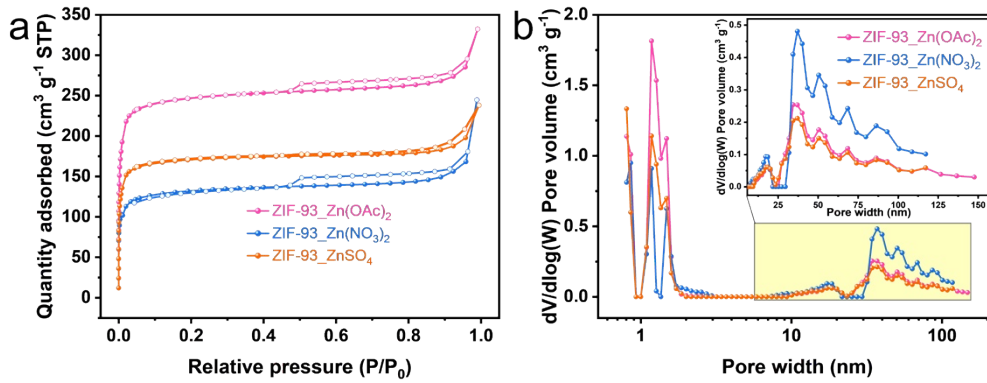

**Fig. S12** (a) N<sub>2</sub> adsorption-desorption isotherms and (b) PSDs of ZIF-93\_Zn(OAc)<sub>2</sub>, ZIF-93\_Zn(NO<sub>3</sub>)<sub>2</sub>, and ZIF-93\_ZnSO<sub>4</sub> samples.

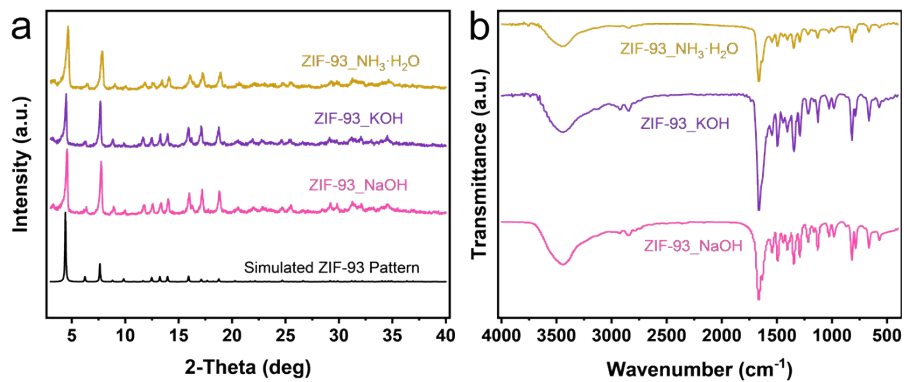

**Fig. S13** (a) Powder XRD patterns of ZIF-93\_NaOH, ZIF-93\_KOH, ZIF-93\_NH<sub>3</sub>·H<sub>2</sub>O samples and simulated XRD pattern of ZIF-93. (b) FT-IR spectra of the as-synthesized ZIF-93\_NaOH, ZIF-93\_KOH, and ZIF-93\_NH<sub>3</sub>·H<sub>2</sub>O samples.

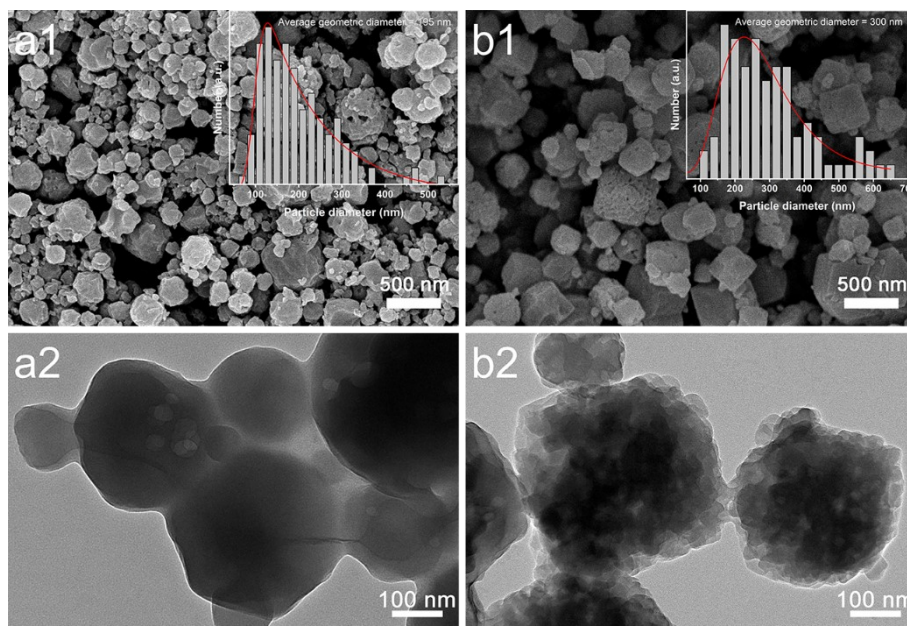

**Fig. S14** SEM and TEM images of ZIF-93 samples: (a) ZIF-93\_NH<sub>3</sub>·H<sub>2</sub>O, (b) ZIF-93\_KOH.

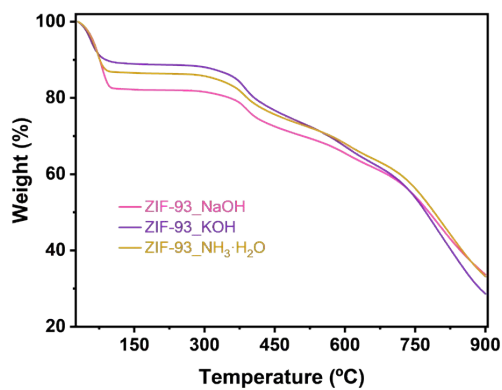

**Fig. S15** TGA curves of ZIF-93\_NaOH, ZIF-93\_KOH, and ZIF-93\_NH<sub>3</sub>·H<sub>2</sub>O samples.

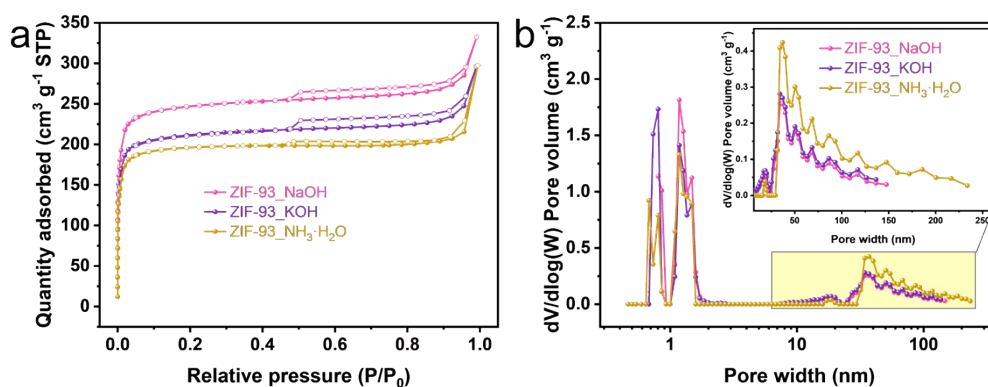

**Fig. S16** (a) N<sub>2</sub> adsorption-desorption isotherms and (b) PSDs of ZIF-93\_NaOH, ZIF-93\_KOH, and ZIF-93\_NH<sub>3</sub>·H<sub>2</sub>O samples.

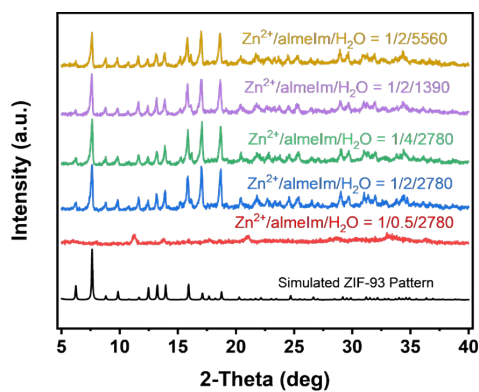

**Fig. S17** Powder XRD patterns of ZIF-93 samples with different molar ratios and simulated XRD pattern of ZIF-93.



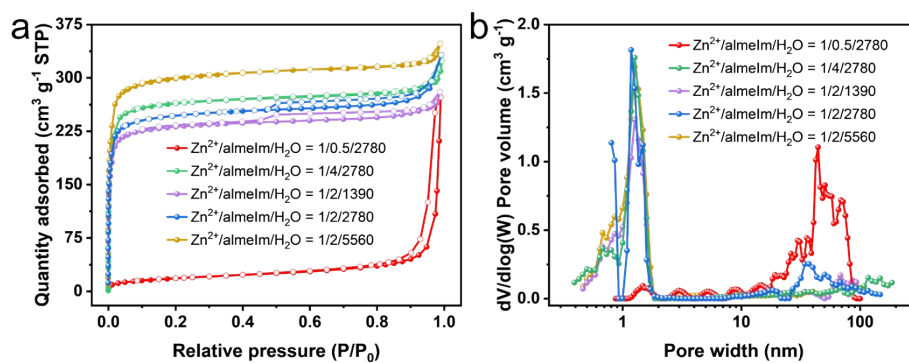

**Fig. S18** (a) N<sub>2</sub> adsorption-desorption isotherms and (b) PSDs of ZIF-93 samples with different molar ratios.

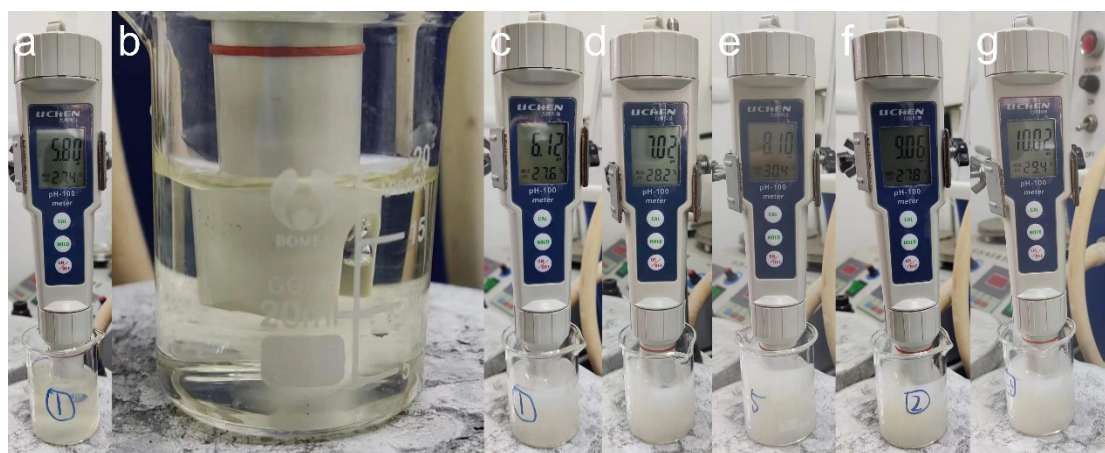

**Fig. S19** Pictures of different pH in the synthesis of ZIF-93: (a) Initial pH, (b) pH=5, (c) pH=6, (d) pH=7, (e) pH=8, (f) pH=9, and (g) pH=10.

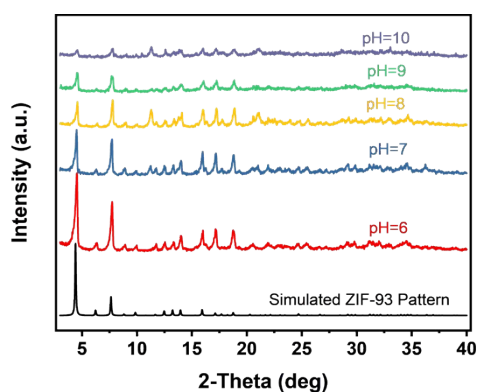

**Fig. S20** Powder XRD patterns of ZIF-93 samples with different pH and simulated XRD pattern of ZIF-93.

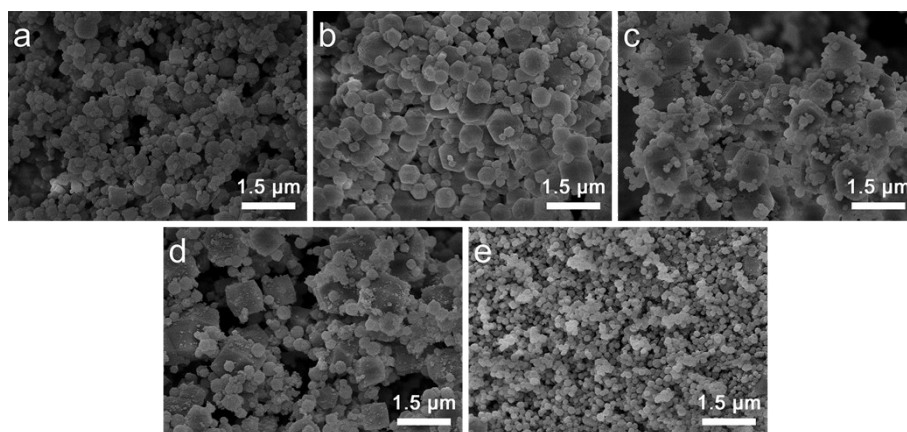

**Fig. S21** SEM images of ZIF-93 samples with different pH: (a) pH=6, (b) pH=7, (c) pH=8, (d) pH=9, and (e) pH=10.

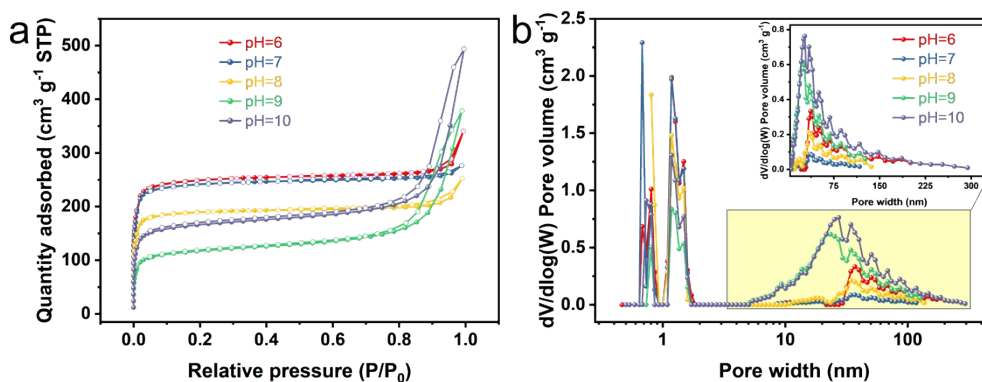

**Fig. S22** (a)  $N_2$  adsorption-desorption isotherms and (b) PSDs of ZIF-93 samples with different pH.

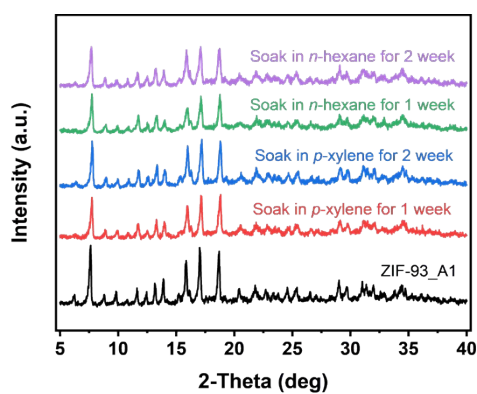

**Fig. S23** XRD patterns of the as-synthesized ZIF-93 after soaking in VOCs at different times.

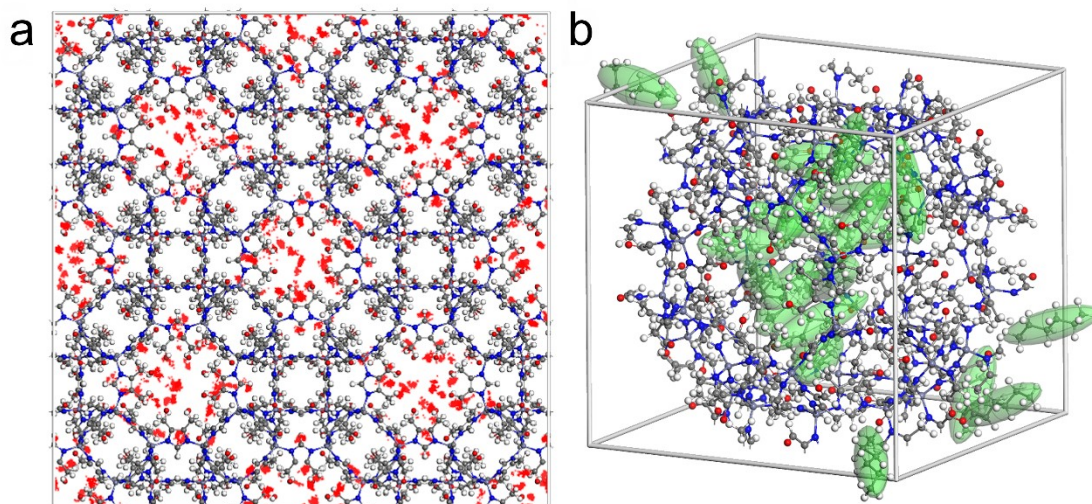

**Fig. S24** (a) Adsorption density distribution and (b) adsorption distribution of *n*-hexane on ZIF-93 at a relative pressure of 0.3 ( $P/P_0$ ).

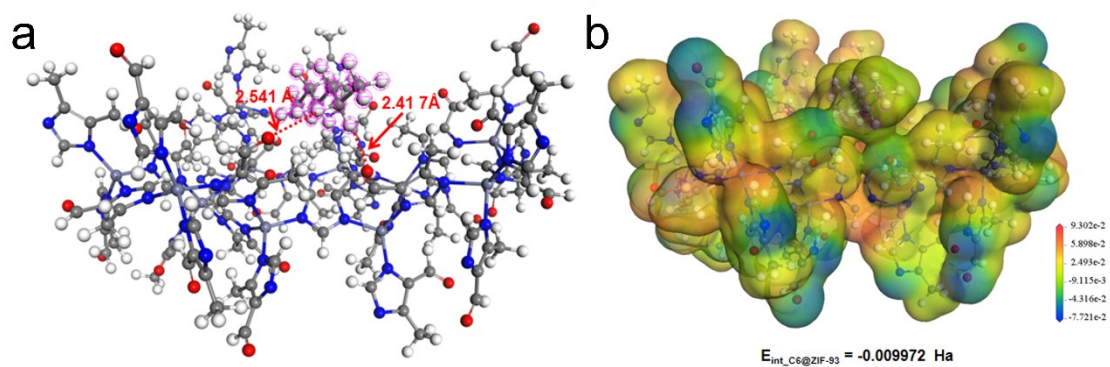

**Fig. S25** (a) Adsorption sites and (b) electrostatic potential of *n*-hexane on ZIF-93.
